# Supplementary material for: Kinetics of the photolysis of pyridaben and its main photoproduct in aqueous environments under simulated solar irradiation
Source: Royal Society of Chemistry journal article supplement (doi:10.1039/d2ra02601e), 2022-01-01
Supplement: d2ra02601e1.pdf [file d2ra02601e1.pdf]

## Electronic Supporting Information

### **Kinetics of the photolysis of pyridaben and its main photoproduct in aqueous environments under simulated solar irradiation**

Mengyuan Pan<sup>a</sup>, Shiyin Mu<sup>a</sup>, Yunfang Li<sup>a</sup>, Ya Yang<sup>a</sup>, Yuping Zhang<sup>a</sup>, Lingzhu Chen<sup>a\*</sup>, Deyu Hu<sup>a\*</sup>

*<sup>a</sup> State Key Laboratory Breeding Base of Green Pesticide and Agricultural Bioengineering, Key Laboratory of Green Pesticide and Agricultural Bioengineering, Ministry of Education, Guizhou University, Guiyang, P. R. China*

\*Authors to whom correspondence should be addressed; e-mail: lzchen@gzu.edu.cn (Lingzhu Chen); gzu\_dyhu@126.com (Deyu Hu); Tel.: (+86)851 88292090; Fax: (+86) 88292090.

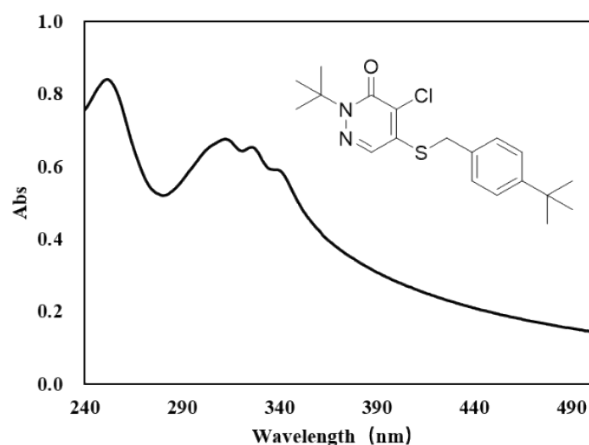

**Figure S1** The structural formula of pyridaben and its UV-Vis absorption spectrum in distilled water (20 mg/L).

**Table S1** Physicochemical characteristics of water samples.

| Water type      | pH   | Conductivity<br>( $\mu\text{S}/\text{cm}$ ) | TDS<br>(mg/L) | Salinity<br>(‰) | DOC<br>(mg/L) |
|-----------------|------|---------------------------------------------|---------------|-----------------|---------------|
| Distilled water | 5.50 | 3.63                                        | 1.68          | 0.00            | 1.069         |
| Tap water       | 7.34 | 457.00                                      | 231.00        | 2.40            | 1.184         |
| Rainwater       | 6.85 | 40.20                                       | 20.50         | 0.20            | 1.446         |
| River water     | 7.15 | 482.00                                      | 243.00        | 2.60            | 1.508         |
| Pond water      | 7.87 | 241.00                                      | 119.80        | 1.20            | 2.257         |

DOC: Dissolved organic carbon

TDS: Total dissolved solids

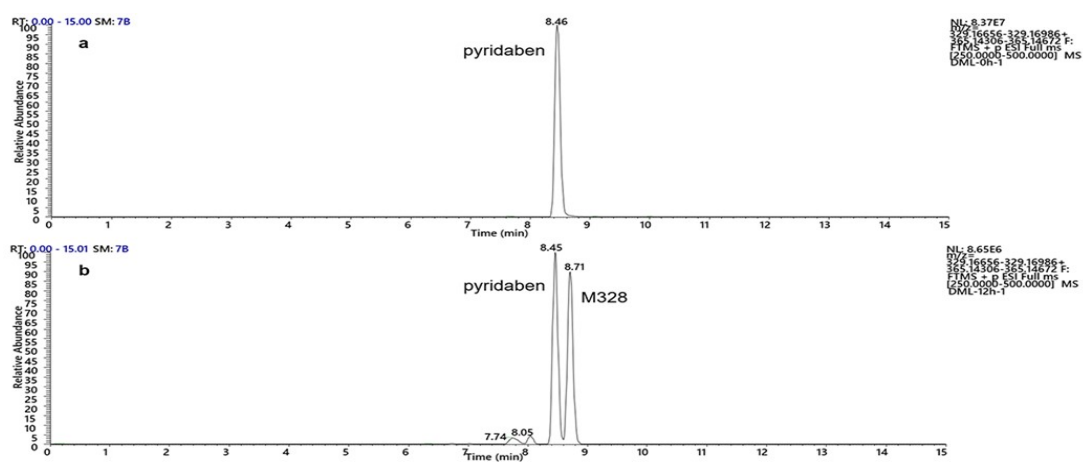

**Figure S2** Extracted ion chromatograms of pyridaben before (a) and after 12 h of photolysis (b).

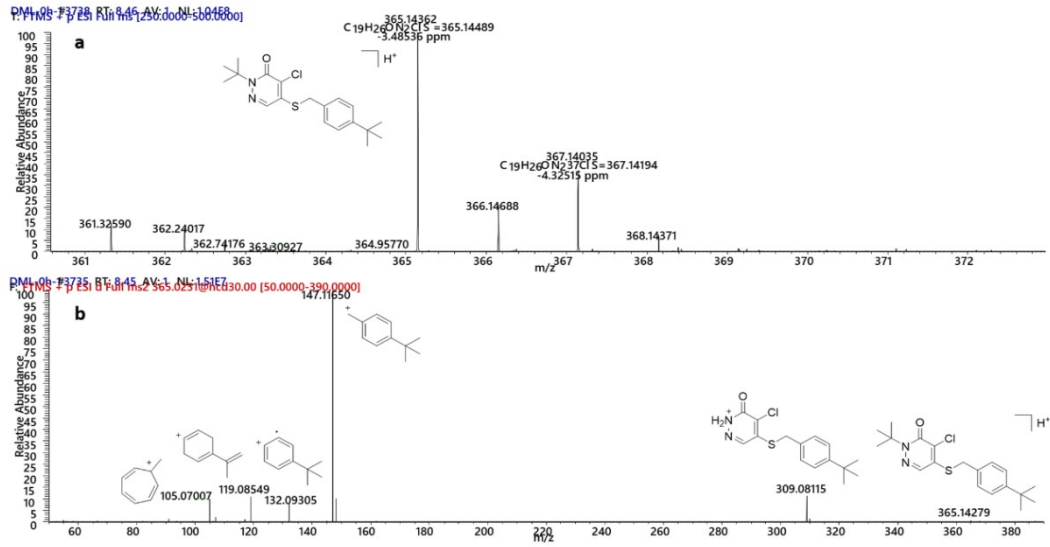

**Figure S3** Full mass spectrum (a) and MS<sup>2</sup> fragmentation spectrum (b) of pyridaben.

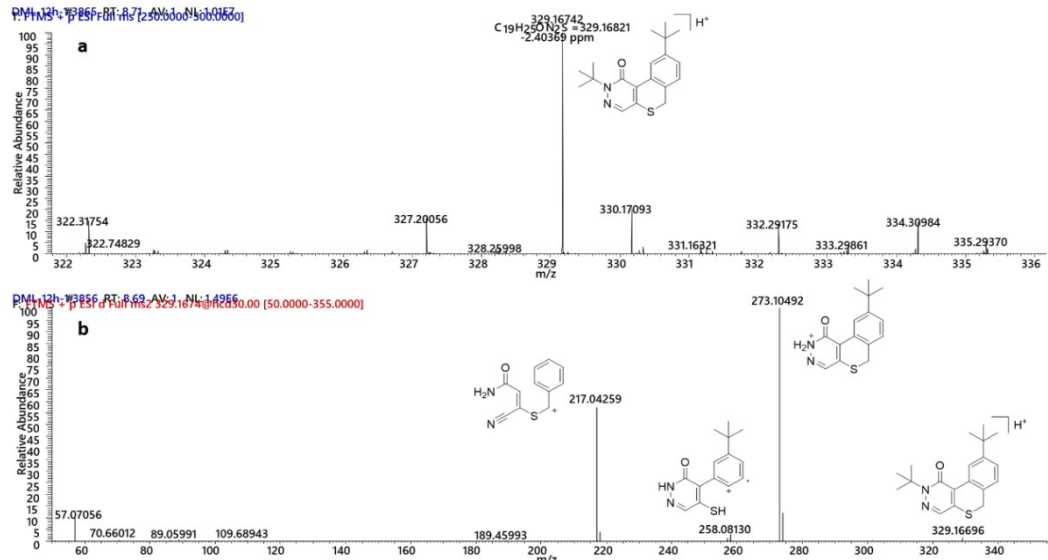

**Figure S4** Full mass spectrum (a) and MS<sup>2</sup> fragmentation spectrum (b) of M328.

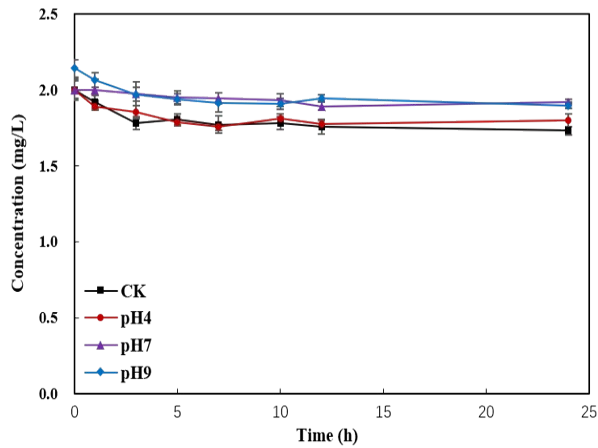

**Figure S5** Hydrolysis kinetics of pyridaben in distilled water and buffer solutions (Dark control).

**Table S2** Degradation kinetic parameters of pyridaben in the different aqueous solutions.

| Impact factors  | Value    | Kinetic equations                                        | $t_{1/2}$ (h) | $p$    |
|-----------------|----------|----------------------------------------------------------|---------------|--------|
| distilled water | /        | $C_1 = 1.803e^{-0.294t}$<br>$C_2 = 0.910e^{-0.083(t-3)}$ | 2.36±0.06     | /      |
| pH              | 4        | $C_1 = 1.853e^{-0.363t}$<br>$C_2 = 0.605e^{-0.063(t-3)}$ | 1.91±0.01     | 0.0058 |
|                 | 7        | $C_t = 2.026e^{-0.127t}$                                 | 5.46±0.00     | 0.0000 |
|                 | 9        | $C_t = 1.880e^{-0.200t}$                                 | 3.47±0.01     | 0.0000 |
| HA              | 1 mg/L   | $C_1 = 1.719e^{-0.473t}$<br>$C_2 = 0.761e^{-0.166(t-3)}$ | 1.47±0.04     | 0.0000 |
|                 | 5 mg/L   | $C_1 = 1.709e^{-0.483t}$<br>$C_2 = 0.672e^{-0.166(t-3)}$ | 1.44±0.04     | 0.0000 |
|                 | 10 mg/L  | $C_1 = 1.717e^{-0.427t}$<br>$C_2 = 0.501e^{-0.092(t-3)}$ | 1.62±0.01     | 0.0001 |
|                 | 20 mg/L  | $C_1 = 1.674e^{-0.357t}$<br>$C_2 = 0.910e^{-0.080(t-3)}$ | 1.94±0.05     | 0.0096 |
| FA              | 1 mg/L   | $C_1 = 1.777e^{-0.316t}$<br>$C_2 = 1.048e^{-0.081(t-3)}$ | 2.23±0.48     | 0.3923 |
|                 | 10 mg/L  | $C_1 = 1.793e^{-0.347t}$<br>$C_2 = 0.814e^{-0.071(t-3)}$ | 2.02±0.29     | 0.0326 |
|                 | 20 mg/L  | $C_1 = 1.782e^{-0.273t}$<br>$C_2 = 0.926e^{-0.046(t-3)}$ | 2.54±0.14     | 0.2177 |
| nitrate         | 0.01 mM  | $C_1 = 1.640e^{-0.366t}$<br>$C_2 = 0.960e^{-0.113(t-3)}$ | 1.90±0.00     | 0.0047 |
|                 | 0.1 mM   | $C_1 = 1.835e^{-0.283t}$<br>$C_2 = 1.050e^{-0.090(t-3)}$ | 2.45±0.13     | 0.5222 |
|                 | 1 mM     | $C_1 = 1.900e^{-0.280t}$<br>$C_2 = 1.104e^{-0.090(t-3)}$ | 2.48±0.23     | 0.4052 |
| iron            | 0.001 mM | $C_1 = 1.643e^{-0.356t}$<br>$C_2 = 0.877e^{-0.108(t-3)}$ | 1.95±0.02     | 0.0104 |
|                 | 0.01 mM  | $C_1 = 1.725e^{-0.203t}$<br>$C_2 = 1.210e^{-0.073(t-3)}$ | 3.43±0.16     | 0.0000 |
|                 | 0.1 mM   | $C_t = 1.749e^{-0.072t}$                                 | 9.56±0.09     | 0.0000 |
| rainwater       | /        | $C_1 = 1.762e^{-0.518t}$<br>$C_2 = 0.643e^{-0.159(t-3)}$ | 1.36±0.02     | 0.0000 |
| tap water       | /        | $C_1 = 1.703e^{-0.430t}$<br>$C_2 = 0.817e^{-0.180(t-3)}$ | 1.61±0.03     | 0.0000 |
| river water     | /        | $C_1 = 1.651e^{-0.392t}$<br>$C_2 = 0.963e^{-0.219(t-3)}$ | 1.77±0.02     | 0.0006 |
| pond water      | /        | $C_1 = 1.768e^{-0.259t}$<br>$C_2 = 0.888e^{-0.221(t-3)}$ | 2.68±0.01     | 0.0379 |

**Table S3** Degradation kinetic parameters of M328 in distilled water, buffer solutions and HA solutions.

| Impact factors  | Value   | Kinetic equations                     | R       | $t_{1/2}$ (h)    | $p$    |
|-----------------|---------|---------------------------------------|---------|------------------|--------|
| distilled water | /       | $C_t = 8.160 \times 10^7 e^{-0.074t}$ | -0.9852 | $9.37 \pm 0.00$  | /      |
| pH              | 4       | $C_t = 7.246 \times 10^7 e^{-0.049t}$ | -0.9554 | $13.95 \pm 1.58$ | 0.0000 |
|                 | 7       | $C_t = 4.147 \times 10^7 e^{-0.057t}$ | -0.9949 | $12.16 \pm 0.00$ | 0.0013 |
|                 | 9       | $C_t = 4.563 \times 10^7 e^{-0.060t}$ | -0.9963 | $11.46 \pm 0.13$ | 0.0068 |
| HA              | 1 mg/L  | $C_t = 6.221 \times 10^7 e^{-0.080t}$ | -0.9912 | $8.67 \pm 0.15$  | 0.2546 |
|                 | 5 mg/L  | $C_t = 7.925 \times 10^7 e^{-0.099t}$ | -0.9698 | $7.07 \pm 0.10$  | 0.0041 |
|                 | 10 mg/L | $C_t = 6.146 \times 10^7 e^{-0.074t}$ | -0.9923 | $9.30 \pm 0.09$  | 0.9130 |
|                 | 20 mg/L | $C_t = 4.936 \times 10^7 e^{-0.067t}$ | -0.9749 | $10.59 \pm 0.34$ | 0.0673 |

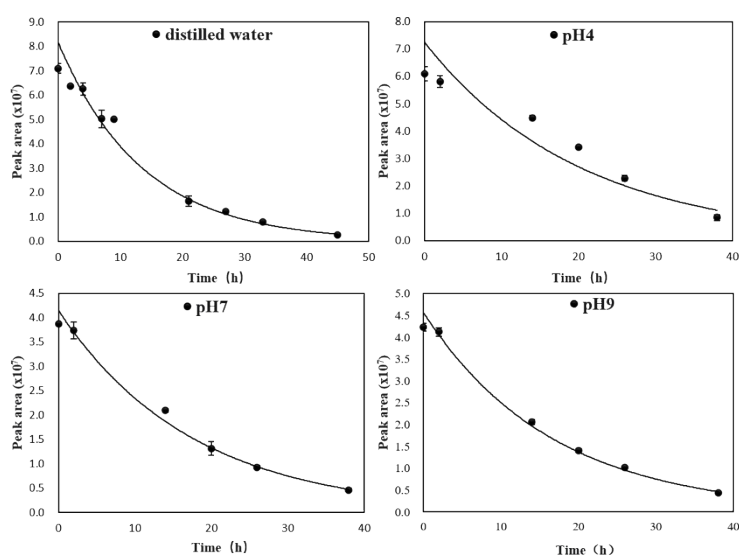

**Figure S6** Pseudo first-order kinetics of the degradation of M328 in distilled water and buffer solutions.

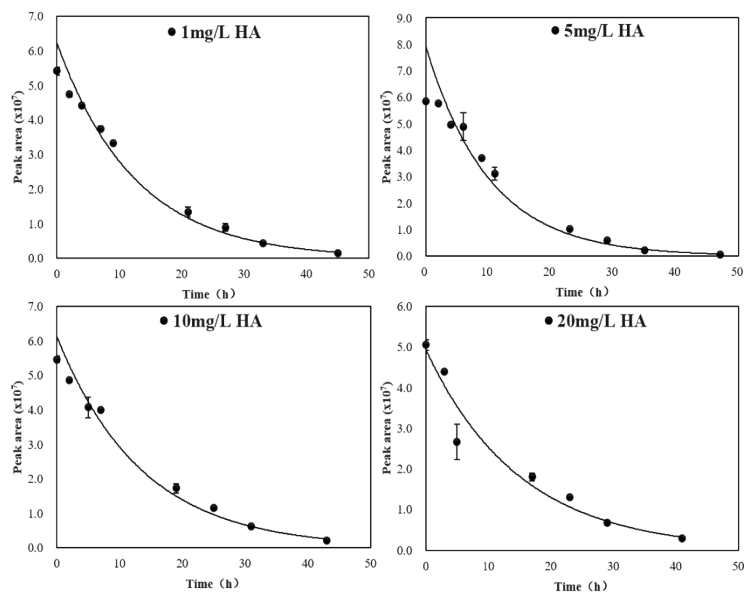

**Figure S7** Pseudo first-order kinetics of the degradation of M328 in HA solutions with different concentrations

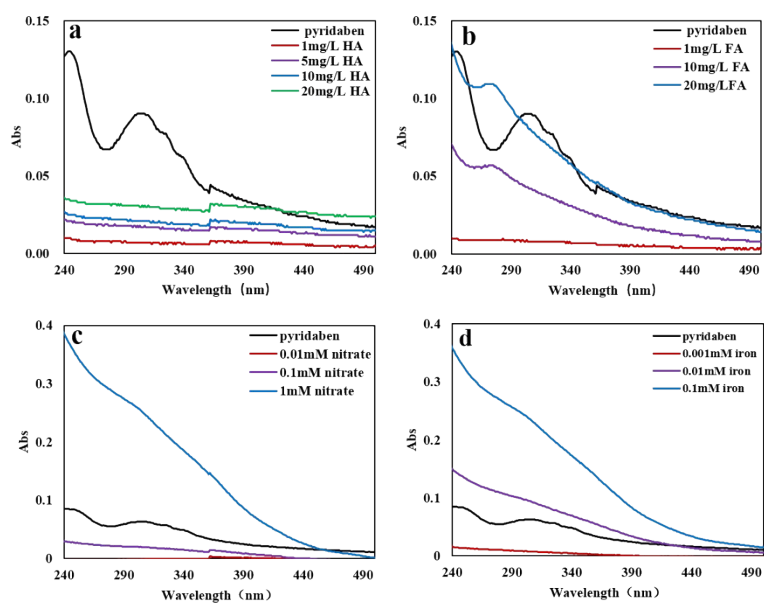

**Figure S8** The UV-Vis absorption spectra of pyridaben (2 mg/L) with HA (a), FA (b), nitrate (c), and iron (d)

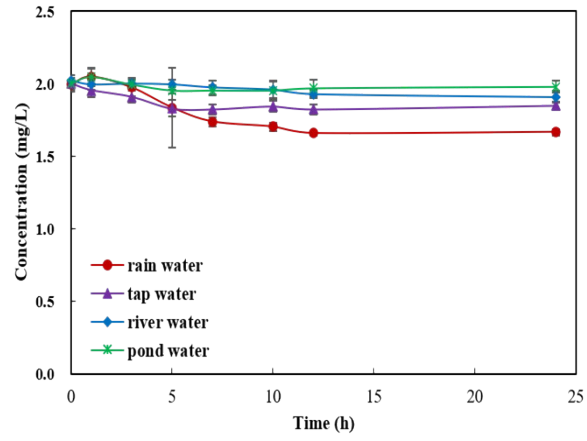

**Figure S9** Dark degradation of pyridaben in tap water and natural waters.
